# Supplementary material for: Modeling of Personalized Treatments in Colon Cancer Based on Preclinical Genomic and Drug Sensitivity Data
Source: MDPI journal article supplement (doi:10.3390/cancers13236018), 2021-11-30

Supplement Figure S1: Subgroup I - MSI hypermutated

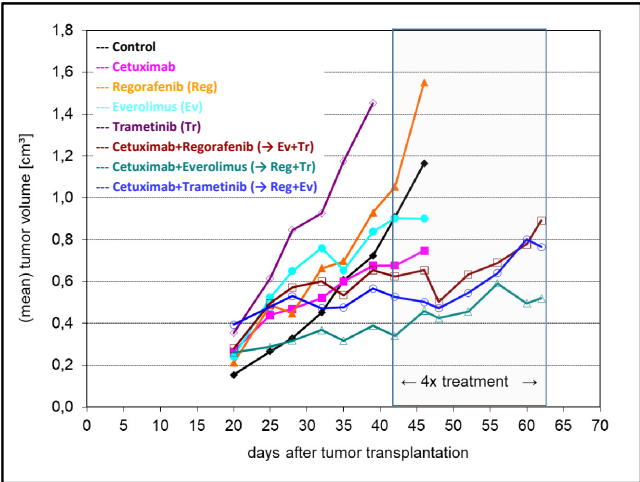

Co11476-299

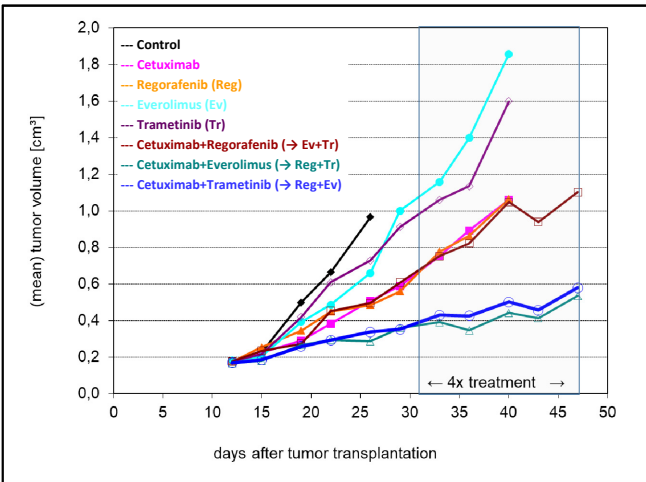

Co11309-278

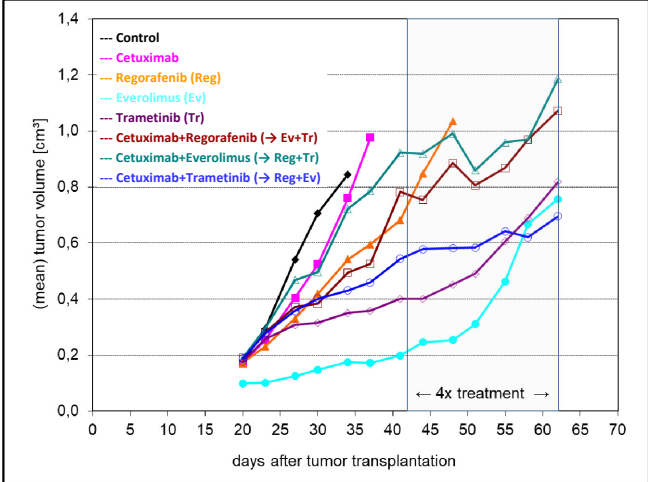

Co10039-106

with corresponding body weight graph

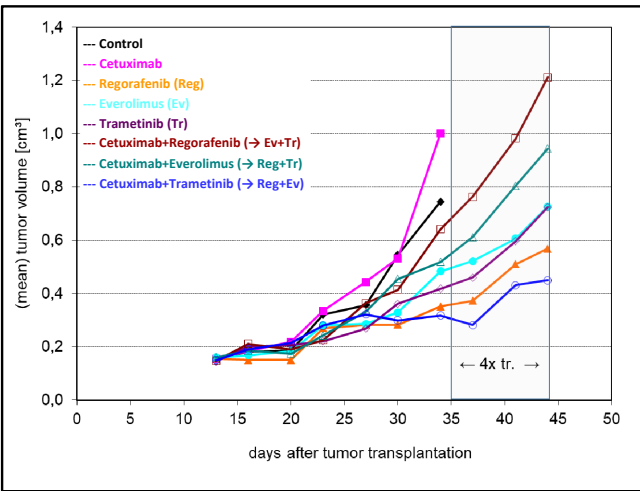

Co11203-261

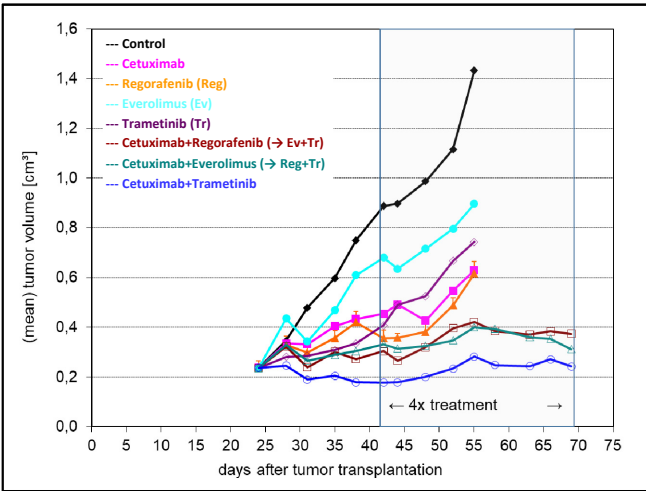

Co11672-327

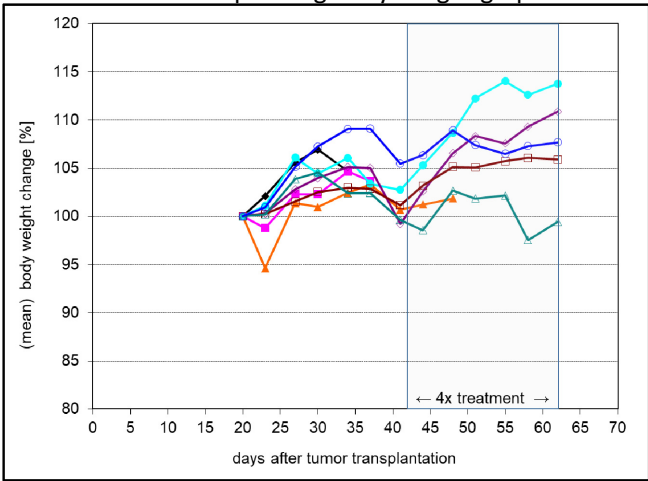

Supplement Figure S2: Subgroup II - MSS BRAF mutated

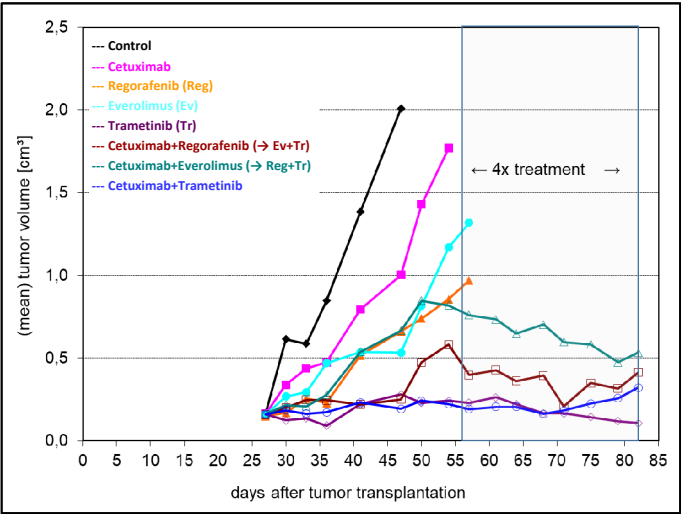

Co10786-181

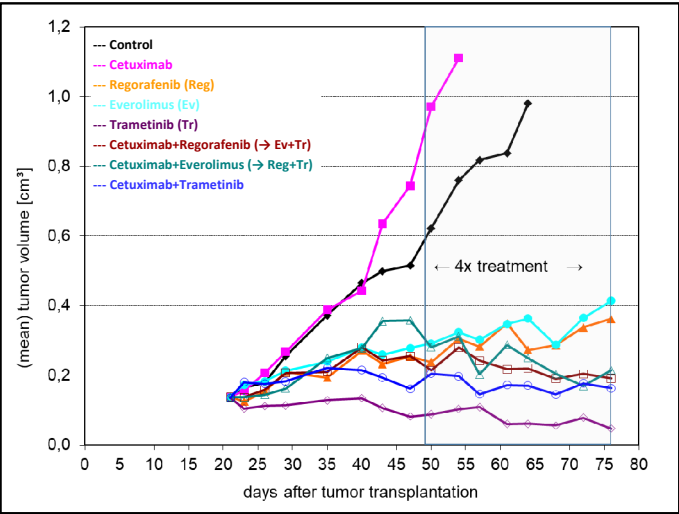

Co10979-212

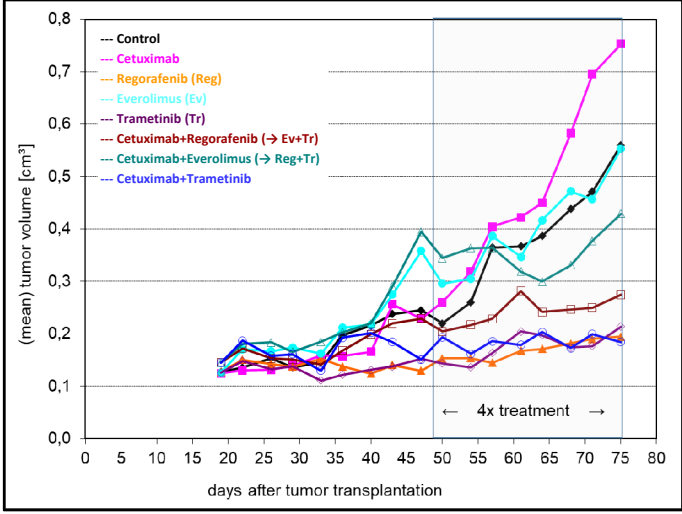

Co10629D-150

with corresponding body weight graph

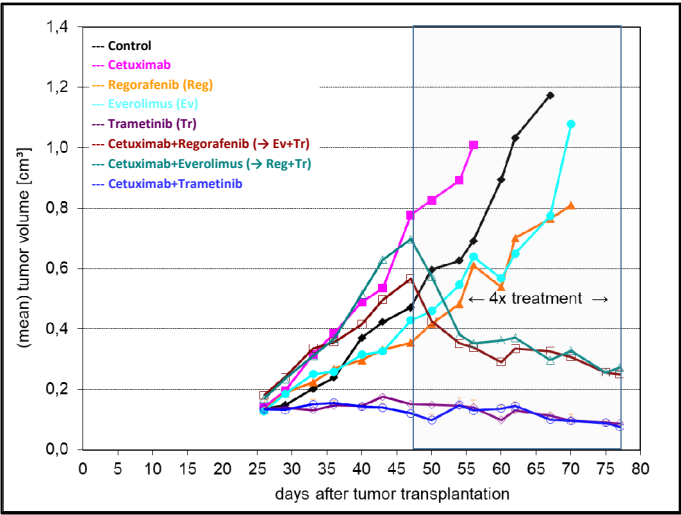

Co11388-289

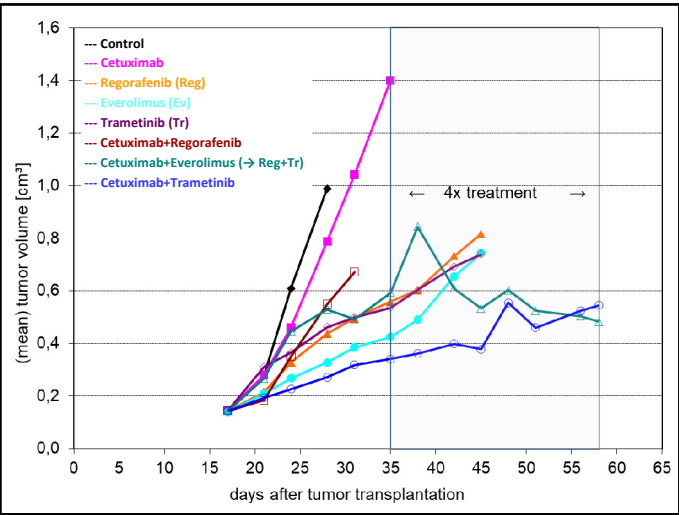

Co11336-283

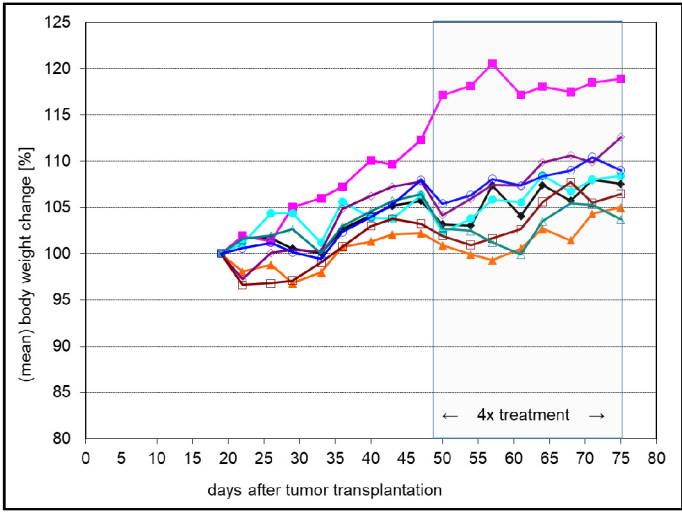

Supplement Figure S3: Subgroup III - MSS KRAS and BRAF wild type

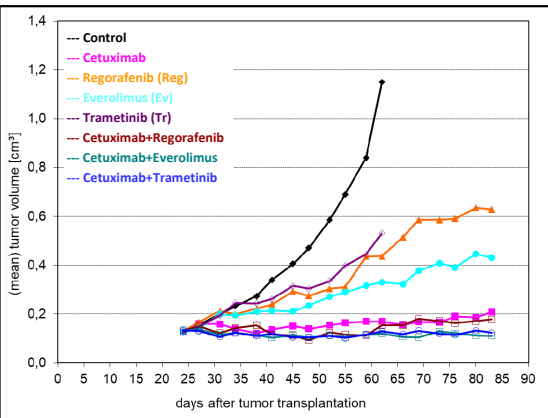

Co11003-216

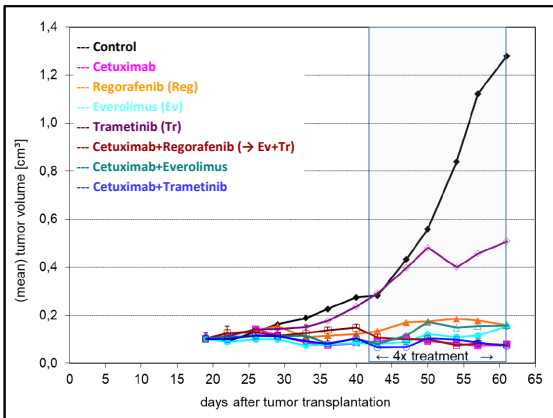

Co10567-139

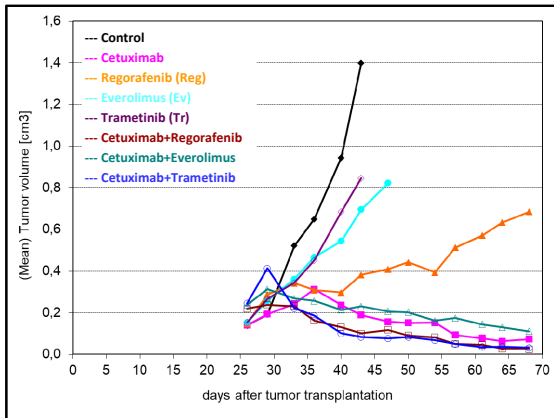

Co10389-116

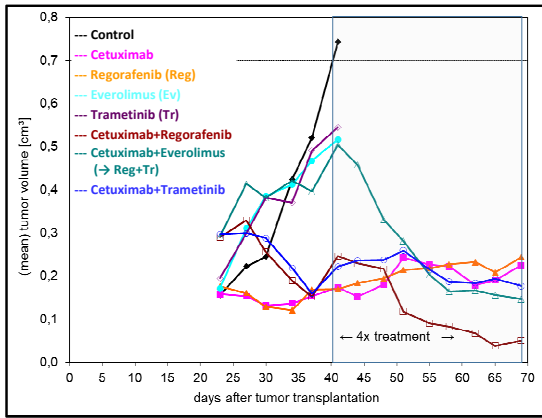

Co11291-273  
with corresponding body weight graph

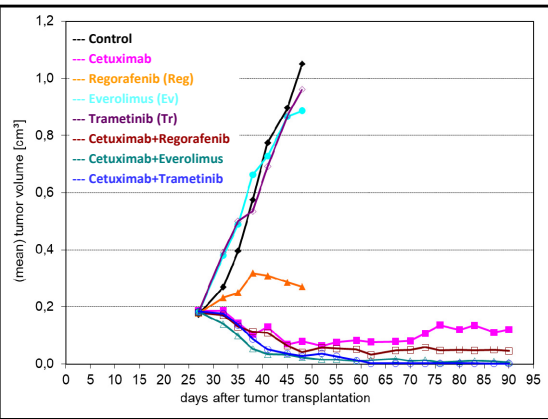

Co11192-259

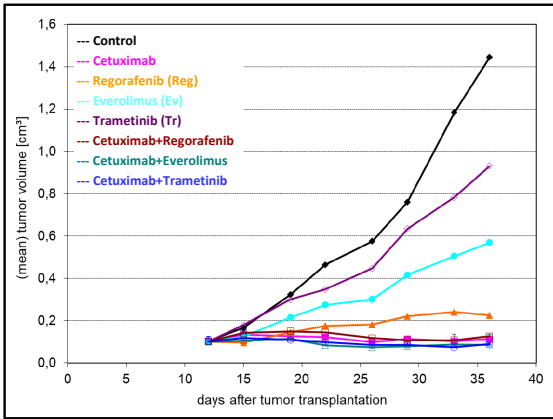

Co11246-208

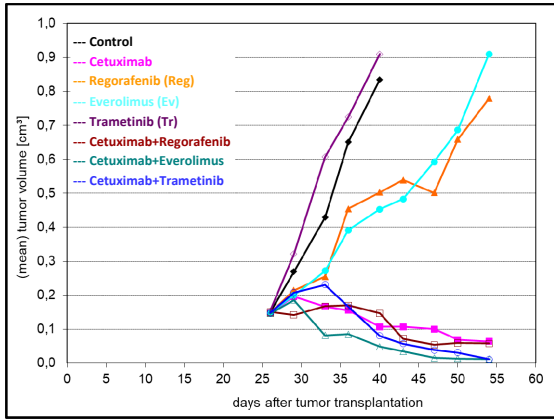

Co10849-191

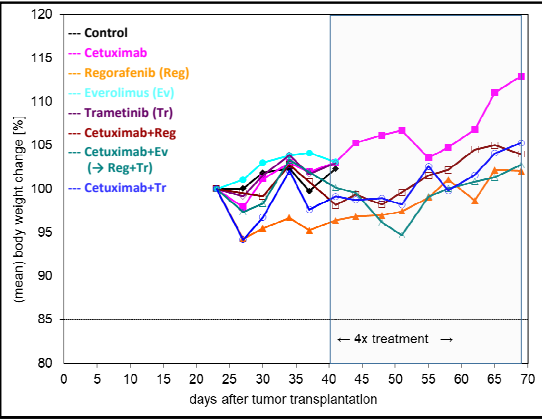

Supplement Figure S4: Subgroup IV - MSS KRAS mutated

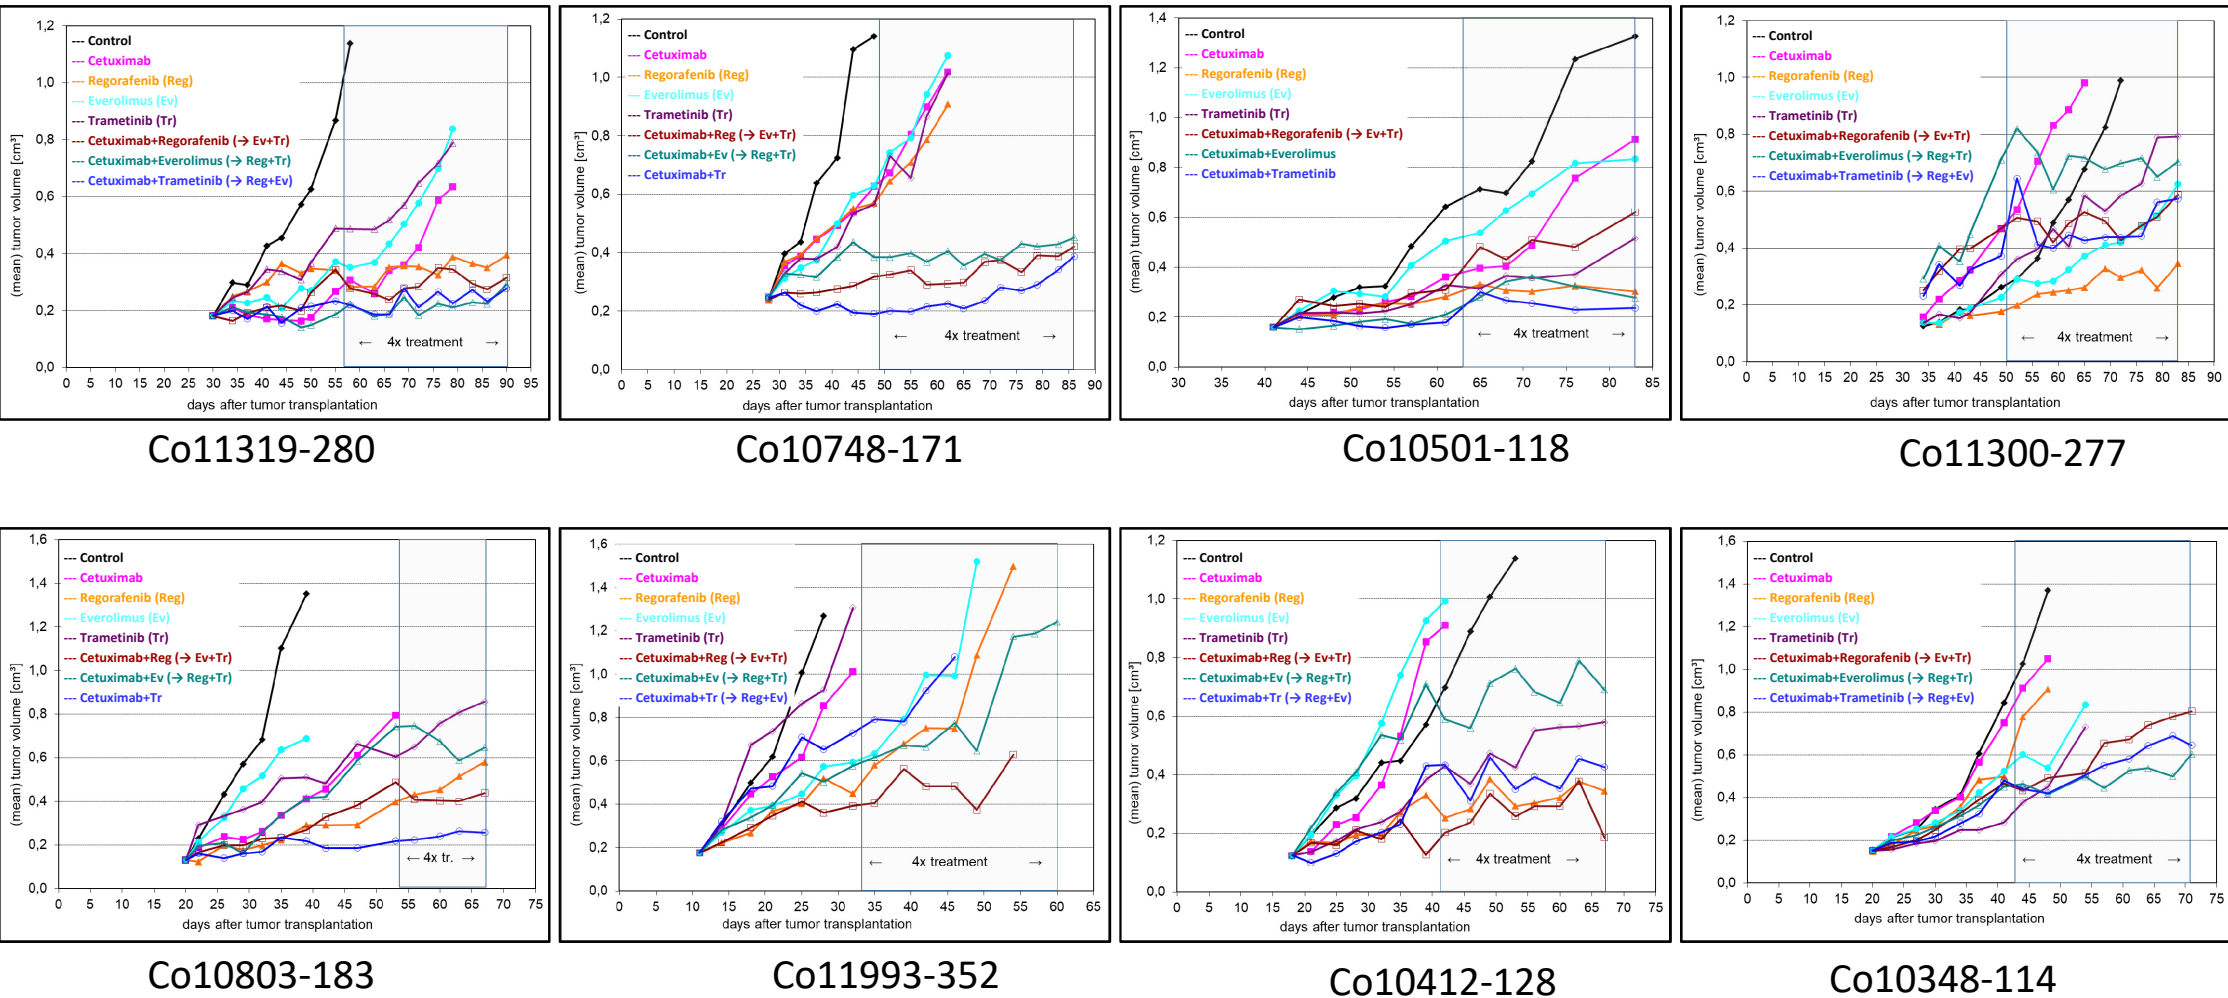

Supplement: s1 [file s1]
